# Supplementary material
Source: Springer Nature journal article supplement (https://www.springermedizin.de/resource/supplementary/12895_2011_126_MOESM4_ESM.pdf/9514192)
Supplement: MOESM4 [file 9514192]

Development, testing and ethical review (where required)  
of questionnaire and interview guide

Recruitment

**HAE Centres of  
Excellence**

- Direct contact of potentially eligible patients
- Advertising at the Centre

**HAE Patient Groups**

- Direct contact of members
- Advertising on website

Invitation and screening  
for eligibility

Informed consent

Questionnaire completion  
(target, n=50/country)

One-to-one interviews  
(selected patients only;  
target, n=10/country)

Data analysis
